# Supplementary material for: A room-temperature antiferroelectric in hybrid perovskite enables highly efficient energy storage at low electric fields
Source: Royal Society of Chemistry journal article supplement (doi:10.1039/d2sc05285g), 2022-01-01
Supplement: d2sc05285g1.pdf [file d2sc05285g1.pdf]

## Supporting Information

### Room-Temperature Antiferroelectric in Hybrid Perovskite Enables Highly-Efficient Energy Storage at Low Electric Fields

Yi Liu,<sup>1</sup> Haojie Xu,<sup>12</sup> Xitao Liu,<sup>1</sup> Shiguo Han,<sup>1</sup> Wuqian Guo,<sup>12</sup> Yu Ma,<sup>12</sup> Qingshun Fan,<sup>12</sup> Xinxin Hu,<sup>12</sup> Zhihua Sun,<sup>\*123</sup> and Junhua Luo<sup>\*12</sup>

<sup>1</sup>State Key Laboratory of Structure Chemistry, Fujian Institute of Research on the Structure of Matter, Chinese Academy of Sciences, Fuzhou, Fujian, 350002, P. R. China

<sup>2</sup>University of Chinese Academy of Sciences Beijing, 100049, P. R. China

<sup>3</sup>Fujian Science & Technology Innovation Laboratory for Optoelectronic Information of China, Fuzhou, Fujian 350108, P. R. China

#### Experimental Section

**Synthesis and single-crystal growth.** The target compound **1** was prepared by mixing stoichiometric ratio of isobutylammonium (10 mmol, 1.52 g), formamidinium acetate (5 mmol, 0.38 g) and  $\text{Pb}(\text{CH}_3\text{COO})_2 \cdot 3\text{H}_2\text{O}$  (10 mmol, 3.79 g) in the 40% w/w solution of hydrobromic acid. After the continuous stirring for 30 min at 373 K, a clear yellow solution was obtained. Plate-like yellow crystals of **1** were obtained by the temperature cooling method after about three weeks, as shown in Figure S1.

**Single-Crystal X-ray Crystallography and Powder X-ray Diffraction.** We used the Bruker D8 Quesr/Venture diffractometer with the Mo  $K\alpha$  radiation ( $\lambda = 0.77 \text{ \AA}$ ) to record X-ray diffraction data. The structures were solved by direct methods and confirmed by the full-matrix least-squares refinements on  $F^2$  using the *SHELXTL* software packing. All non-H atoms were refined anisotropically, and all H atoms were generated by geometrical method and refined by using a “riding” model with  $U_{\text{iso}} = 1.2 U_{\text{eq}}$  (C). The above-mentioned structure solution and refinement were conducted in the *Olex2* software. Crystal data for **1** at 200 and 310 K are listed in Table S1. Powder X-ray diffractometry (PXRD) data was recorded on the MiniFlex 600 X-ray diffractometer equipped with a Cu  $K\alpha$  radiation.

**Measurements.** The dielectric analyses were performed on TongHui TH2828 analyzer in the temperature range of 270-330 K. Single-crystal plates of **1** with the surface deposited by silver conduction paste were used for dielectric measurements. DSC measurement of **1** was recorded by using a NETZSCH DSC 200F3 instrument in the

temperature range of 270-330 K. The powder samples that placed in aluminum crucibles were heated and cooled with a rate of 5 K·min<sup>-1</sup> under a nitrogen atmosphere. The *P-E* hysteresis loops were carried out on a ferroelectric analyzer (Radiant Precision Premier II). For the *P-E* loop measurement, the crystal sample with size of 0.5 × 0.4 × 0.4 mm<sup>3</sup> was used. The sample thickness was 0.4 mm and both sides were printed with silver electrodes with an area of approximately 0.16 mm<sup>2</sup>. In order to avoid electric discharge at high electric field, single crystal of **1** was immersed in silicone oil to measure the *P-E* hysteresis loops. Domain structures of the grown crystal were observed using a Nikon Eclipse LV100POL polarizing microscope along [010] crystal wafer.

[CCDC 2157694 and 2157696 contain the supplementary crystallographic data for this paper. These data can be obtained free of charge from The Cambridge Crystallographic Data Centre via [www.ccdc.cam.ac.uk/data\\_request/cif](http://www.ccdc.cam.ac.uk/data_request/cif).]

**Figure**

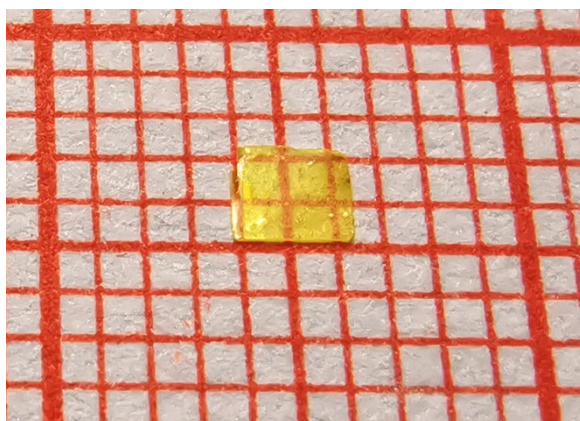

**Figure S1.** Plate-like single crystal of **1** obtained by the temperature-cooling method.

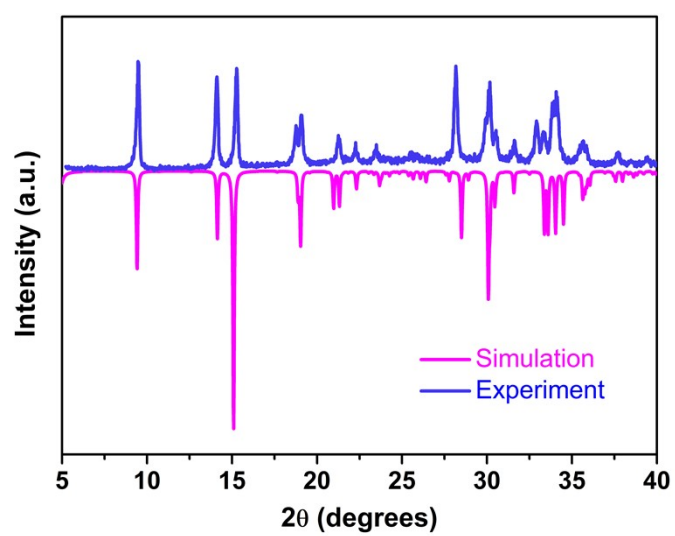

**Figure S2.** Experimental and simulated PXRD patterns for **1** at room temperature.

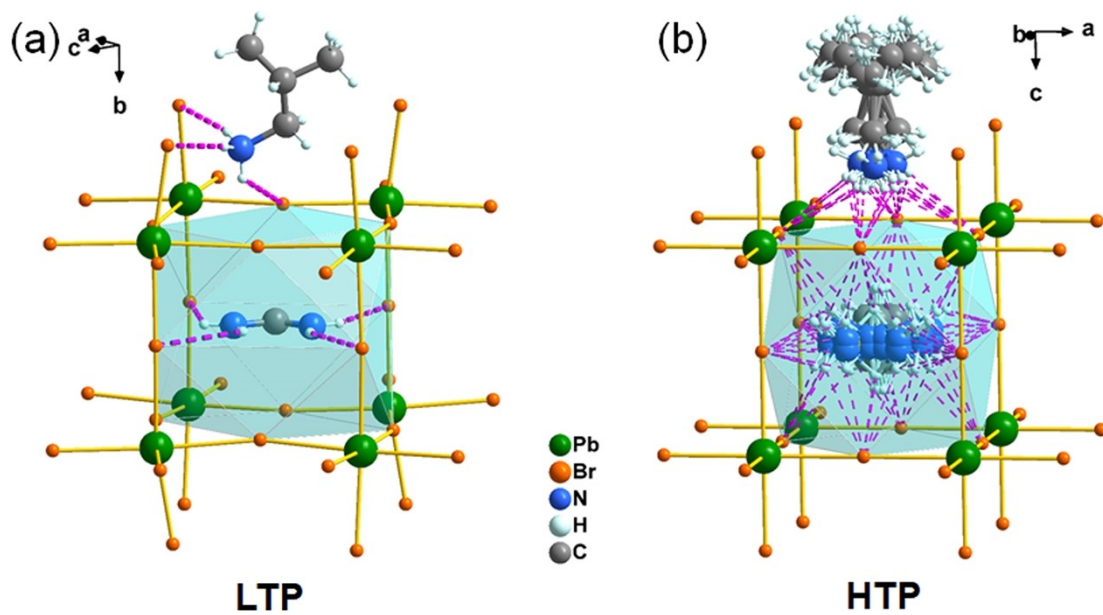

**Figure S3.** The N-H...Br hydrogen-bonding interactions between organic cations and inorganic perovskite frameworks of **1** at (a) low-temperature phase (LTP, 200 K) and (b) high-temperature phase (HTP, 310 K). Purple dotted lines represent the N-H...Br hydrogen bonds.

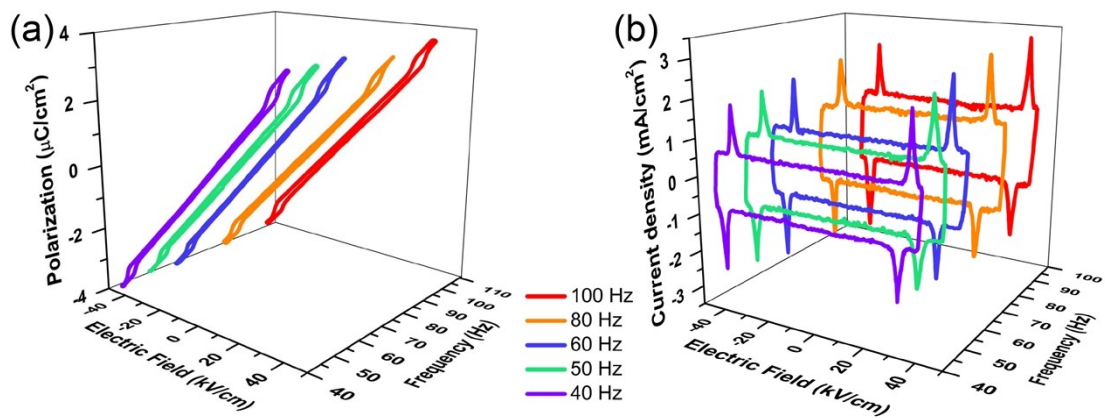

**Figure S4.** Frequency-dependent (a) double  $P$ - $E$  hysteresis loops and (b)  $J$ - $E$  curves.

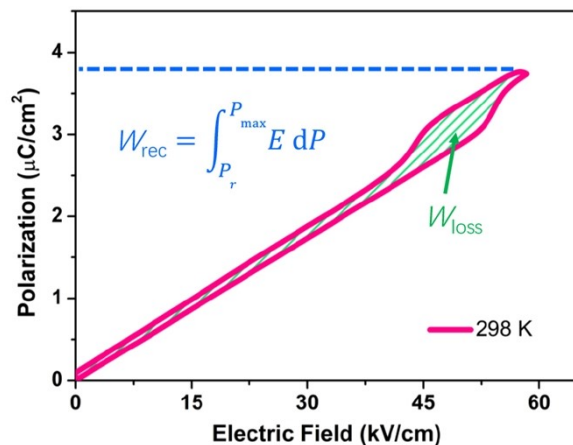

Figure S5. Schematic diagram for energy storage properties of **1** obtained from the typical  $P$ - $E$  hysteresis loop.

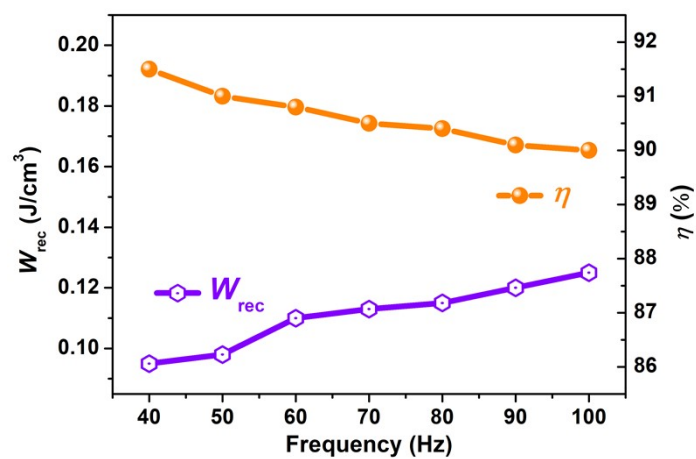

Figure S6. Energy density  $W_{\text{rec}}$  and energy storage efficiency  $\eta$  of **1** as a function of frequency.

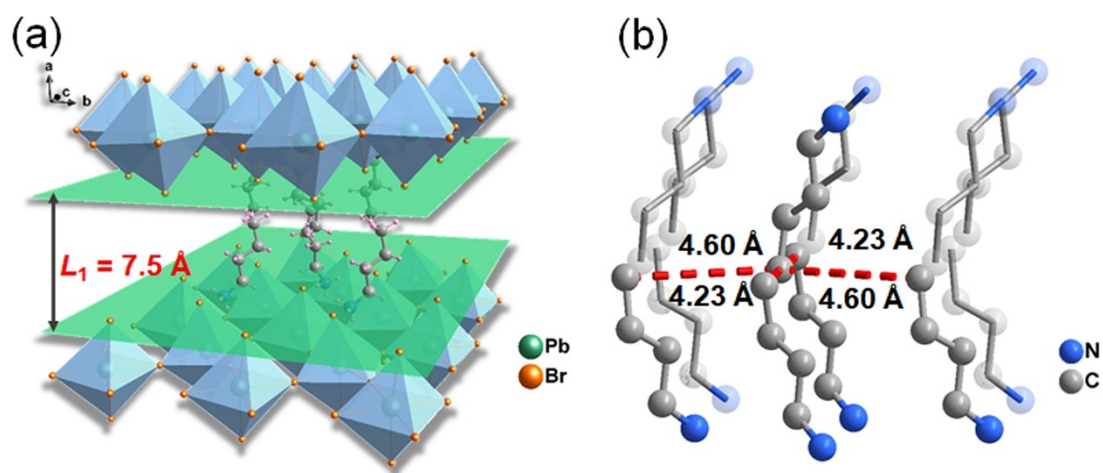

Figure S7. (a) The interlayered space and (b) atomic distance between the adjacent layers of organic  $n\text{-BA}^+$  cations in  $(n\text{-BA})_2(\text{FA})\text{Pb}_2\text{Br}_7$ .

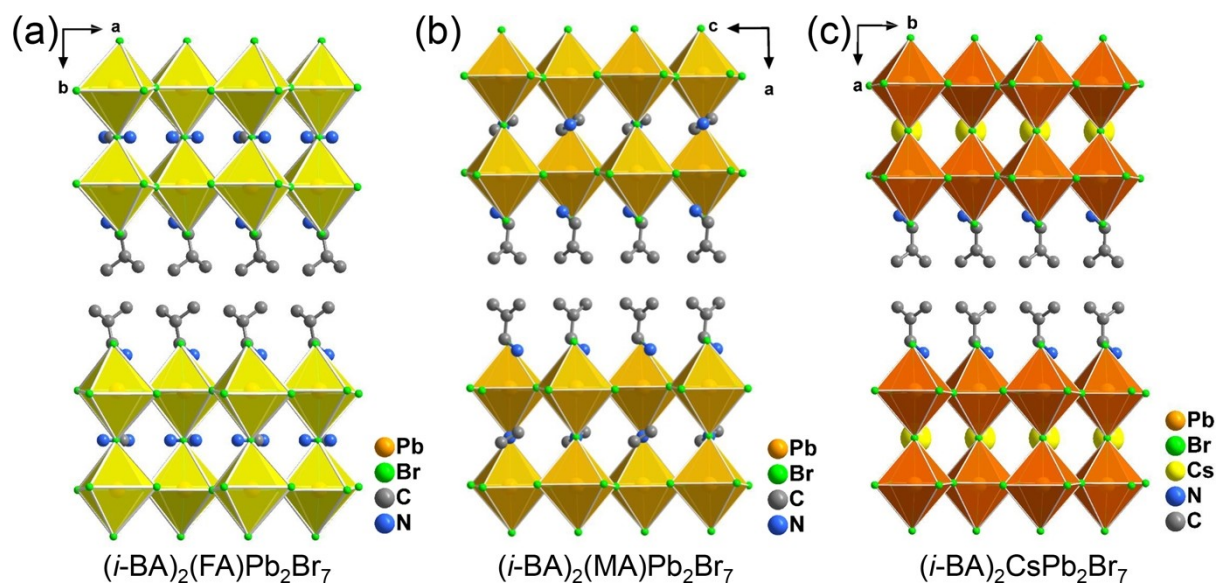

**Figure S8.** A series of 2D hybrid perovskites,  $(i\text{-BA})_2(\text{A})\text{Pb}_2\text{Br}_7$ , created by alloying the cationic spacer ( $i\text{-BA}^+$ ) and “perovskitizer” ( $\text{FA}^+$ ,  $\text{MA}^+$  and  $\text{Cs}^+$ ). Obviously, the adjacent  $i\text{-BA}^+$  cations exhibit the antiparallel reorientation.

## Table

**Table S1.** Crystal data for **1** collected at low-temperature phase (LTP, 200 K) and high-temperature phase (HTP, 310 K).

|                                                              | LTP                                                                           | HTP                                                                           |
|--------------------------------------------------------------|-------------------------------------------------------------------------------|-------------------------------------------------------------------------------|
| Empirical formula                                            | C <sub>9</sub> H <sub>29</sub> Br <sub>7</sub> N <sub>4</sub> Pb <sub>2</sub> | C <sub>9</sub> H <sub>29</sub> Br <sub>7</sub> N <sub>4</sub> Pb <sub>2</sub> |
| Formula weight                                               | 1167.11                                                                       | 1167.11                                                                       |
| Temperature/K                                                | 200                                                                           | 310                                                                           |
| Crystal system                                               | Orthorhombic                                                                  | Tetragonal                                                                    |
| Space group                                                  | <i>Pnma</i>                                                                   | <i>I4/mmm</i>                                                                 |
| <i>a</i> (Å)                                                 | 8.3299(4)                                                                     | 5.9841(2)                                                                     |
| <i>b</i> (Å)                                                 | 37.549(3)                                                                     | 5.9841(2)                                                                     |
| <i>c</i> (Å)                                                 | 8.4639(5)                                                                     | 38.4072(17)                                                                   |
| <i>V</i> (Å <sup>3</sup> )                                   | 2647.3(3)                                                                     | 1659.7(3)                                                                     |
| <i>D</i> <sub>calca</sub> /Mg·m <sup>-3</sup>                | 2.928                                                                         | 2.818                                                                         |
| <i>Z</i>                                                     | 4                                                                             | 2                                                                             |
| $\mu$ (mm <sup>-1</sup> )                                    | 23.269                                                                        | 22.394                                                                        |
| <i>F</i> (000)                                               | 2080.0                                                                        | 1040.0                                                                        |
| 2 $\theta$ range /°                                          | 4.934 to 54.996                                                               | 7.03 to 55.17                                                                 |
| Index ranges                                                 | -10 ≤ <i>h</i> ≤ 10, -48 ≤ <i>k</i> ≤ 43, -10 ≤ <i>l</i> ≤ 10                 | -7 ≤ <i>h</i> ≤ 7, -7 ≤ <i>k</i> ≤ 7, -49 ≤ <i>l</i> ≤ 47                     |
| Reflections collected                                        | 21033                                                                         | 5626                                                                          |
| Independent reflections                                      | 3070 [ <i>R</i> <sub>int</sub> = 0.0758, <i>R</i> <sub>sigma</sub> = 0.0517]  | 538 [ <i>R</i> <sub>int</sub> = 0.0649, <i>R</i> <sub>sigma</sub> = 0.0318]   |
| Data/restraints/parameters                                   | 3070/38/109                                                                   | 538/98/88                                                                     |
| Goodness-of-fit on <i>F</i> <sup>2</sup>                     | 1.083                                                                         | 1.082                                                                         |
| Final <i>R</i> indexes [ <i>I</i> ≥ 2 $\sigma$ ( <i>I</i> )] | <i>R</i> <sub>1</sub> = 0.0554, <i>wR</i> <sub>2</sub> = 0.1474               | <i>R</i> <sub>1</sub> = 0.0386, <i>wR</i> <sub>2</sub> = 0.1033               |
| Final <i>R</i> indexes [all data]                            | <i>R</i> <sub>1</sub> = 0.0774, <i>wR</i> <sub>2</sub> = 0.1605               | <i>R</i> <sub>1</sub> = 0.0466, <i>wR</i> <sub>2</sub> = 0.1119               |

**Table S2.** Bond lengths of crystal **1** at 200 K.

| Atom | Atom             | Length/Å  | Atom | Atom | Length/Å  |
|------|------------------|-----------|------|------|-----------|
| Pb1  | Br1              | 3.070(5)  | N3   | C3   | 1.508(17) |
| Pb1  | Br2 <sup>1</sup> | 2.968(12) | C3   | C4   | 1.44(2)   |
| Pb1  | Br2              | 3.013(12) | C4   | N5   | 1.44(3)   |
| Pb1  | Br3 <sup>2</sup> | 3.027(12) | C4   | C6   | 1.51(2)   |
| Pb1  | Br3              | 3.052(12) | N1   | C1   | 1.308(3)  |
| Pb1  | Br4              | 2.916(16) | N2   | C1   | 1.285(2)  |

Symmetry transformations used to generate equivalent atoms: <sup>1</sup>1/2+*X*, *Y*, -*Z*-3/2; <sup>2</sup>1/2+*X*, *Y*, -*Z*-1/2

**Table S3.** Bond angles of crystal **1** at 200 K.

| Bond                                   | Angle/°   | Bond                      | Angle/°   |
|----------------------------------------|-----------|---------------------------|-----------|
| Br2 <sup>1</sup> -Pb1-Br1              | 88.85(4)  | Br4-Pb1-Br2               | 98.43(4)  |
| Br2-Pb1-Br1                            | 90.48(4)  | Br4-Pb1-Br3 <sup>2</sup>  | 84.74(4)  |
| Br2 <sup>1</sup> -Pb1-Br2              | 90.21(13) | Br4-Pb1-Br3               | 92.64(4)  |
| Br2 <sup>1</sup> -Pb1-Br3              | 176.31(4) | Pb1 <sup>3</sup> -Br1-Pb1 | 177.11(6) |
| Br2-Pb1-Br3                            | 91.75(3)  | Pb1 <sup>4</sup> -Br2-Pb1 | 159.73(5) |
| Br2 <sup>1</sup> -Pb1-Br3 <sup>2</sup> | 90.02(3)  | Pb1 <sup>5</sup> -Br3-Pb1 | 160.25(5) |
| Br2-Pb1-Br3 <sup>2</sup>               | 176.82(4) | C4-C3-N3                  | 115.5(12) |
| Br3-Pb1-Br1                            | 88.00(4)  | C3-C4-C6                  | 110.5(15) |
| Br3 <sup>2</sup> -Pb1-Br1              | 86.35(4)  | C5-C4-C3                  | 118.0(18) |
| Br3 <sup>2</sup> -Pb1-Br3              | 87.86(13) | C5-C4-N6                  | 110.5(16) |
| Br4-Pb1-Br1                            | 171.04(4) | N2-C1-N1                  | 124(3)    |
| Br4-Pb1-Br2 <sup>1</sup>               | 90.16(4)  |                           |           |

Symmetry transformations used to generate equivalent atoms: <sup>1</sup>1/2+X, Y, -Z-3/2; <sup>2</sup>1/2+X, Y, -Z-1/2; <sup>3</sup>X, -Y+1/2, Z; <sup>4</sup>X-1/2, Y, -Z-3/2; <sup>5</sup>X-1/2, Y, -Z-1/2

**Table S4.** Hydrogen bonds of crystal **1** at 200 K.

| D-H...A                   | d(D-H) | d(H...A) | < DHA  | d(D..A) |
|---------------------------|--------|----------|--------|---------|
| N1-H1A...Br1 <sup>6</sup> | 0.880  | 3.117    | 108.60 | 3.480   |
| N1-H1B...Br1 <sup>1</sup> | 0.884  | 3.128    | 110.40 | 3.535   |
| N2-H2C...Br1 <sup>4</sup> | 0.880  | 2.695    | 142.58 | 3.436   |
| N2-H2D...Br1 <sup>5</sup> | 0.878  | 2.690    | 148.83 | 3.471   |
| N3-H3A...Br4 <sup>1</sup> | 0.914  | 2.499    | 170.96 | 3.404   |
| N3-H3B...Br4 <sup>2</sup> | 0.908  | 2.580    | 164.15 | 3.463   |
| N3-H3C...Br2 <sup>3</sup> | 0.908  | 2.878    | 121.28 | 3.485   |

Symmetry transformations used to generate equivalent atoms: <sup>1</sup>X-1/2, Y, -Z-1/2; <sup>2</sup>X-1, Y, Z; <sup>3</sup>X-1/2, Y, -Z-3/2; <sup>4</sup>X+1/2, Y, -Z-1/2; <sup>5</sup>X, Y, Z+1; <sup>6</sup>X+1/2, -Y+3/2, -Z+3/2



**Table S5.** Energy storage efficiency ( $\eta$ ) for various reported antiferroelectrics at room temperature.

| Antiferroelectrics                                                                                             | $E_{cr}$ (kV/cm) | $\eta$ (%) | Ref.      |
|----------------------------------------------------------------------------------------------------------------|------------------|------------|-----------|
| TFMBI                                                                                                          | 22               | 44         | [1]       |
| (BA) <sub>2</sub> (EA) <sub>2</sub> Pb <sub>3</sub> I <sub>10</sub>                                            | 32               | 65         | [2]       |
| ( <i>i</i> -BA) <sub>2</sub> CsPb <sub>2</sub> Br <sub>7</sub>                                                 | 75               | 69         | [3]       |
| TCMBI                                                                                                          | 81               | 62         | [1]       |
| DFMBI                                                                                                          | 86               | 78         | [1]       |
| AgNbO <sub>3</sub>                                                                                             | 150              | 46         | [4]       |
| 0.90PHf-0.10PMW                                                                                                | 155              | 72         | [5]       |
| [H-55dmbp][Hca]                                                                                                | 173              | 90         | [6]       |
| Ag(Nb <sub>0.85</sub> Ta <sub>0.15</sub> )O <sub>3</sub>                                                       | 175              | 69         | [7]       |
| Ag <sub>0.97</sub> Bi <sub>0.01</sub> NbO <sub>3</sub>                                                         | 200              | 55         | [8]       |
| SQA                                                                                                            | 210              | 90         | [9]       |
| Ag <sub>0.94</sub> La <sub>0.02</sub> NbO <sub>3</sub>                                                         | 273              | 73         | [10]      |
| Sm <sub>0.03</sub> Ag <sub>0.91</sub> NbO <sub>3</sub>                                                         | 290              | 69         | [11]      |
| PHS-0.075                                                                                                      | 320              | 79         | [12]      |
| 0.86NaNbO <sub>3</sub> -0.14(Bi <sub>0.5</sub> Na <sub>0.5</sub> )HfO <sub>3</sub>                             | 350              | 80         | [13]      |
| PLHT-0.05                                                                                                      | 360              | 89         | [14]      |
| Pb <sub>0.98</sub> La <sub>0.02</sub> (Hf <sub>0.45</sub> Sn <sub>0.55</sub> ) <sub>0.995</sub> O <sub>3</sub> | 380              | 94         | [15]      |
| PbZrO <sub>3</sub>                                                                                             | 463              | 68         | [16]      |
| (Pb <sub>0.95</sub> Sr <sub>0.05</sub> )ZrO <sub>3</sub>                                                       | 500              | 78         | [16]      |
| NLNT <sub>0.18</sub> -0.01BCB                                                                                  | 550              | 66         | [17]      |
| <b>Compound 1</b>                                                                                              | 41               | 91         | This work |

## References

1. S. Horiuchi, F. Kagawa, K. Hatahara, K. Kobayashi, R. Kumai, Y. Murakami and Y. Tokura, *Nat. Commun.*, 2012, **3**, 1308.
2. S. Han, X. Liu, Y. Liu, Z. Xu, Y. Li, M. Hong, J. Luo and Z. Sun, *J. Am. Chem. Soc.*, 2019, **141**, 12470-12474.
3. Z. Wu, X. Liu, C. Ji, L. Li, S. Wang, Y. Peng, K. Tao, Z. Sun, M. Hong and J. Luo, *J. Am. Chem. Soc.*, 2019, **141**, 3812-3816.
4. Y. Tian, L. Jin, H. Zhang, Z. Xu, X. Wei, E. D. Politova, S. Y. Stefanovich, N. V. Tarkina, I. Abrahams and H. Yan, *J. Mater. Chem. A*, 2016, **4**, 17279-17287.
5. P. Gao, Z. Liu, N. Zhang, H. Wu, A. A. Bokov, W. Ren and Z.-G. Ye, *Chem. Mater.*, 2019, **31**, 979-990.
6. S. Horiuchi, R. Kuma and S. Ishibashi, *Chem. Sci.*, 2018, **9**, 425-432.
7. L. Zhao, Q. Liu, J. Gao, S. Zhang and J.-F. Li, *Adv. Mater.*, 2017, **29**, 1701824.

8. Y. Tian, L. Jin, H. Zhang, Z. Xu, X. Wei, G. Viola, I. Abrahams and H. Yan, *J. Mater. Chem. A*, 2017, **5**, 17525-17531.
9. S. Horiuchi and S. Ishibashi, *Chem. Sci.*, 2021, **12**, 14198-14206.
10. J. Gao, Y. Zhang, L. Zhao, K.-Y. Lee, Q. Liu, A. Studer, M. Hinterstein, S. Zhang and J.-F. Li, *J. Mater. Chem. A*, 2019, **7**, 2225-2232.
11. N. N. Luo, K. Han, F. P. Zhuo, C. Xu, G. Z. Zhang, L. J. Liu, X. Y. Chen, C. Z. Hu, H. F. Zhou and Y. Z. Wei, *J. Mater. Chem. A*, 2019, **7**, 14118-14128.
12. P.-Z. Ge, X.-G. Tang, K. Meng, X.-X. Huang, S.-F. Li, Q.-X. Liu and Y.-P. Jiang, *Chem. Eng. J.*, 2022, **429**, 132540.
13. Z. T. Yang, H. L. Du, L. Jin, Q. Y. Hu, H. Wang, Y. F. Li, J. F. Wang, F. Gao and S. B. Qu, *J. Mater. Chem. A*, 2019, **7**, 27256-27266.
14. P.-Z. Ge, X.-G. Tang, K. Meng, X.-X. Huang, Q.-X. Liu, Y.-P. Jiang, W.-P. Gong and T. Wang, *Mater. Today Phys.*, 2022, **24**, 100681.
15. W. Chao, T. Yang and Y. Li, *J. Mater. Chem. C*, 2020, **8**, 17016-17024.
16. X. Hao, J. Zhai and X. Yao, *J. Am. Ceram. Soc.*, 2009, **92**, 1133-1135.
17. J. Chen, H. Qi and R. Zuo, *ACS Appl. Mater. Interfaces*, 2020, **12**, 32871-32879.
